# Supplementary material
Source: publisher figshare collection journal article supplement (https://tandf.figshare.com/ndownloader/files/17661551)
Supplement: Supplementary file 1 [file 17661551]

**Electronic Supplementary information**

**UV-light-driven photocatalytic degradation and antimicrobial properties of efficient ternary semiconductor CdxAg1-xS nanocomposites**

Dasari Ayodhya* and Guttena Veerabhadram

Department of Chemistry, Osmania University, Hyderabad-500007, Telangana state, India

*Corresponding author e-mail: [ayodhyadasari@gmail.com](mailto:ayodhyadasari@gmail.com)

Mobile: 91-9010877323

**Author’s information**

1. Dr. Dasari Ayodhya

Department of Chemistry, Osmania University, Hyderabad-500007, Telangana state, India

E-mail: [ayodhyadasari@gmail.com](mailto:ayodhyadasari@gmail.com)

Mobile: +91-9010877323

2. Dr. Guttena Veerabhadram

Department of Chemistry, Osmania University, Hyderabad-500007, Telangana state, India

E-mail: [gvbhadram@osmania.ac.in](mailto:gvbhadram@osmania.ac.in)

Mobile: +91-9885179305

**
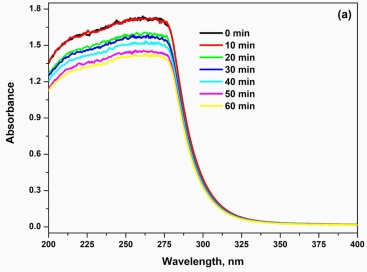

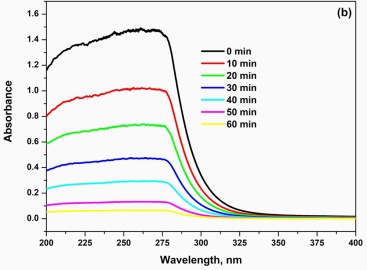

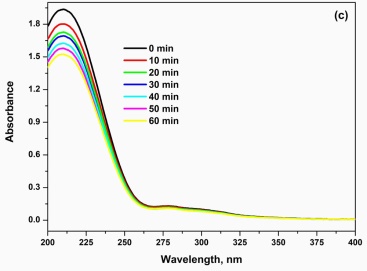

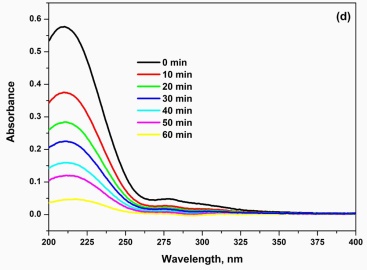

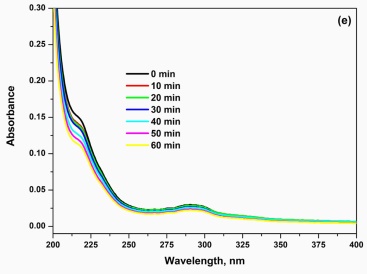

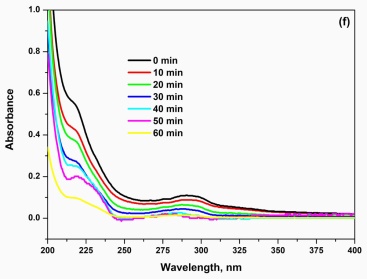
**

**Figure S1.** The UV-vis absorption spectra of the photocatalytic degradation of (a-b) MLT, (c-d) MCP and (e-f) CPS in the absence and presence of Cd0.5Ag0.5S composites under 1 h UV light irradiation, respectively


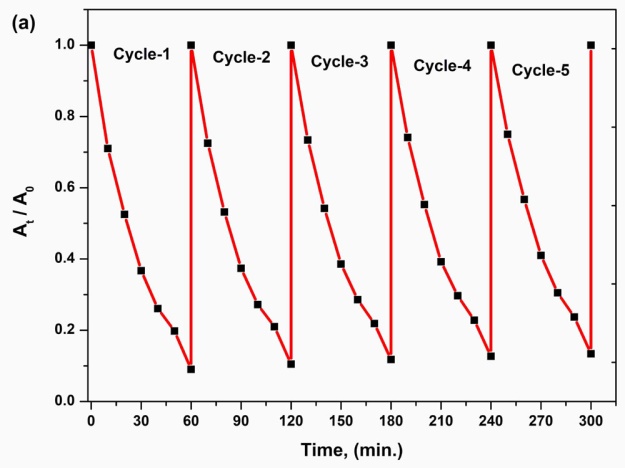


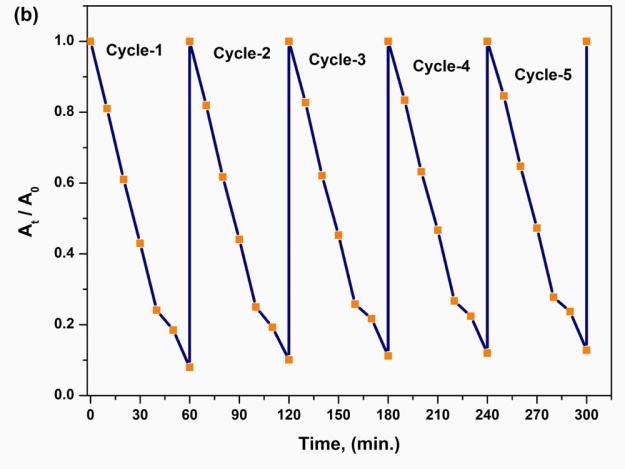


**Figure S2.** Five cycling runs on the photocatalytic degradation of (a) MCP and (b) CPS using Cd0.5Ag0.5S nanocomposite under 1 h UV light irradiation

**
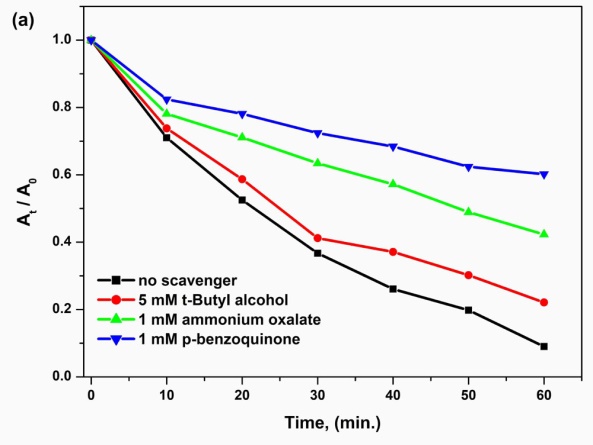
**

**
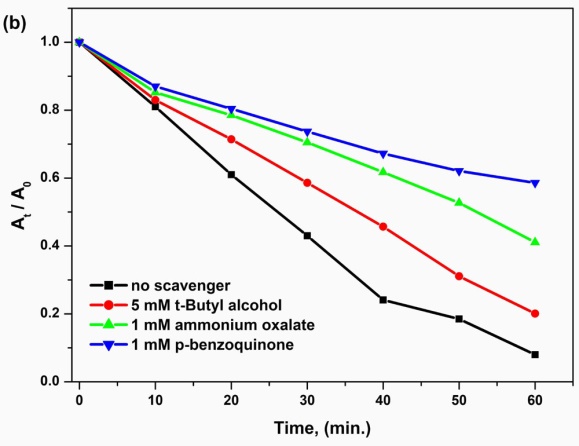
**

**Figure S3.** Effects of the addition of different scavengers on the photocatalytic degradation of (a) MCP and (b) CPS using Cd0.5Ag0.5S nanocomposite under 1 h UV light irradiation
